# Supplementary material for: A High-Resolution, Long-Term Global Radar-Based Above-Ground Biomass Dataset from 1993 to 2020
Source: Copernicus journal article supplement (doi:10.5194/essd-2025-330), 2025-07-24
Supplement: Supplementary file 1 [file essd-2025-330-supplement.pdf]

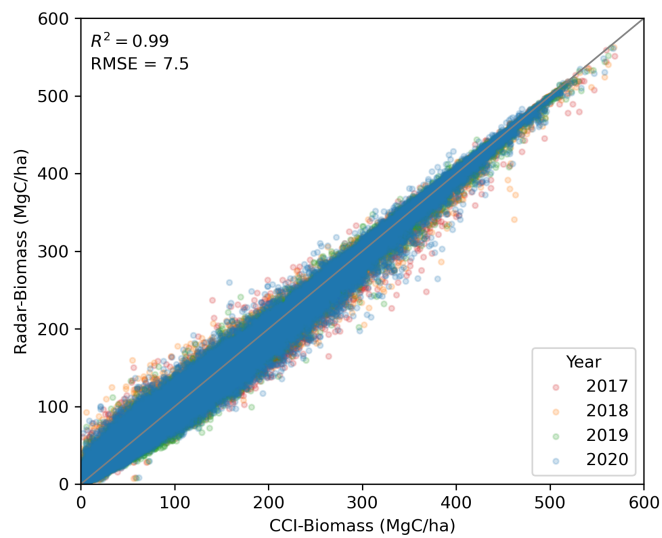

**Figure S1.** Comparison of AGC mean spatial patterns during 2000-2019.

**A. This study**

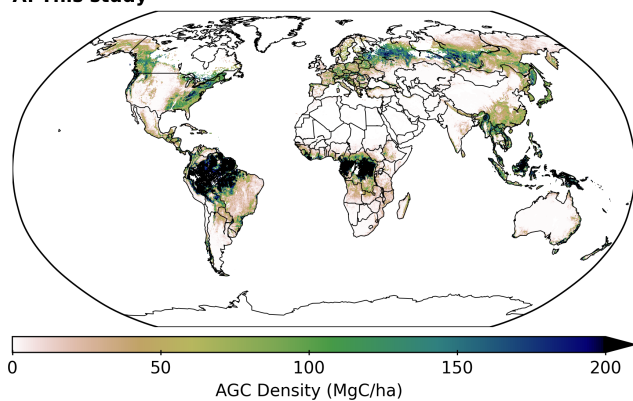

**B. Besnard et al.**

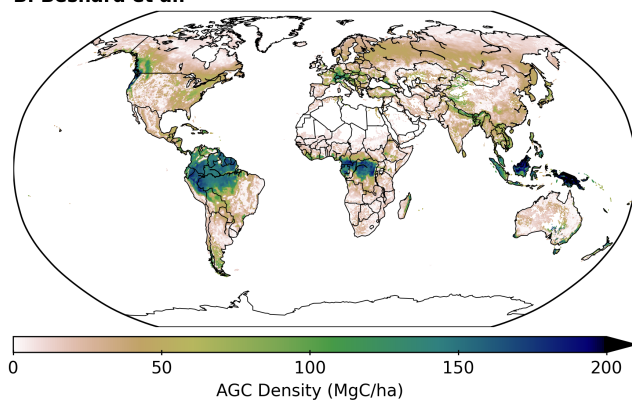

**C. Xu et al.**

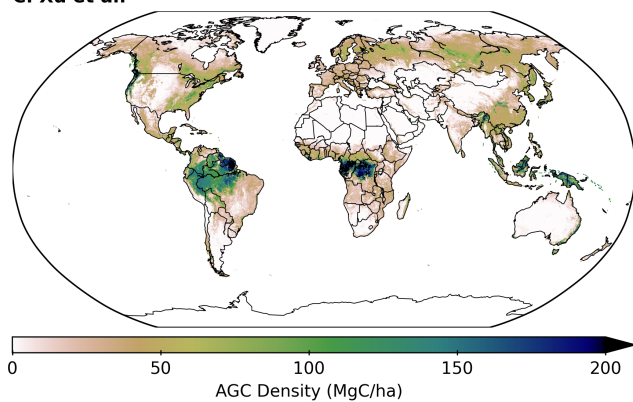

**D. SMOS**

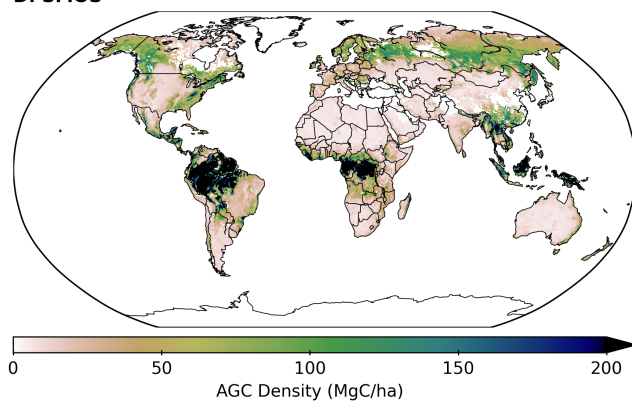

**Figure S2.** Comparison of the mean spatial distribution in AGC from 2017 to 2020 between our study and three other AGC products.
